# Supplementary material for: Free-standing and flexible 0D CeO2 nanodot/1D La(OH)3 nanofiber heterojunction net as a novel efficient and easily recyclable photocatalyst
Source: Royal Society of Chemistry journal article supplement (doi:10.1039/d0qi01074j), 2020-01-01
Supplement: d0qi01074j1.pdf [file d0qi01074j1.pdf]

## Electronic Supplementary Information

### **Free-standing and flexible 0D CeO<sub>2</sub> nanodots/1D La(OH)<sub>3</sub> nanofibers heterojunctions net as a novel efficient and easily recyclable photocatalyst**

Kun Wang,<sup>a</sup> Yujun Liang,<sup>\*a</sup> Jian Yang,<sup>a</sup> Gui Yang,<sup>a</sup> Zikang Zeng,<sup>a</sup> Rui Xu<sup>b</sup> and Xianjun Xie<sup>\*b</sup>

<sup>a</sup> Engineering Research Center of Nano-Geomaterials of Ministry of Education, Faculty of Materials Science and Chemistry, China University of Geosciences, Wuhan 430074, China. Email: yujunliang@sohu.com.

<sup>b</sup> State Key Laboratory of Biogeology and Environmental Geology & School of Environmental Studies, China University of Geosciences, Wuhan 430074, China. Email: xjxie@cug.edu.cn.

### **Synthesis of CeO<sub>2</sub> nanodots**

CeO<sub>2</sub> nanodots were prepared by a facile molten salt process. In a typical process, 1 mmol Ce(NO<sub>3</sub>)<sub>3</sub>·6H<sub>2</sub>O was mixed with 2 g NaOH and 8 g KOH uniformly grinded thoroughly for over 20 min in an agate mortar. After that, the grinded mixture was placed in a 50 mL Telfonlined oxidation-resisting steel autoclave with 1.5 mL of deionized water, then heated to 150 °C for 8 h. Finally, the obtained samples were washed with deionized water and ethanol for several times, and then dried at 80 °C over night.

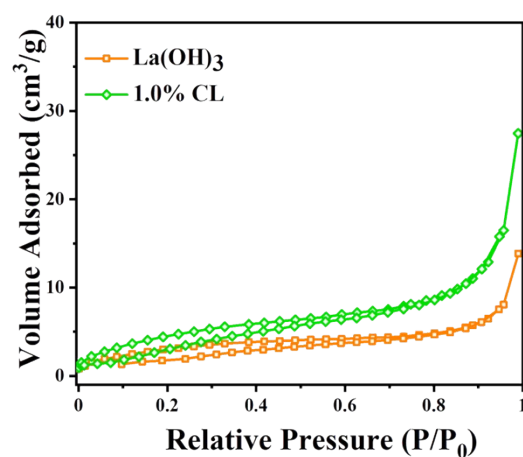

Fig. S1 N<sub>2</sub> adsorption/desorption isotherms of La(OH)<sub>3</sub> and 1.0% CL.

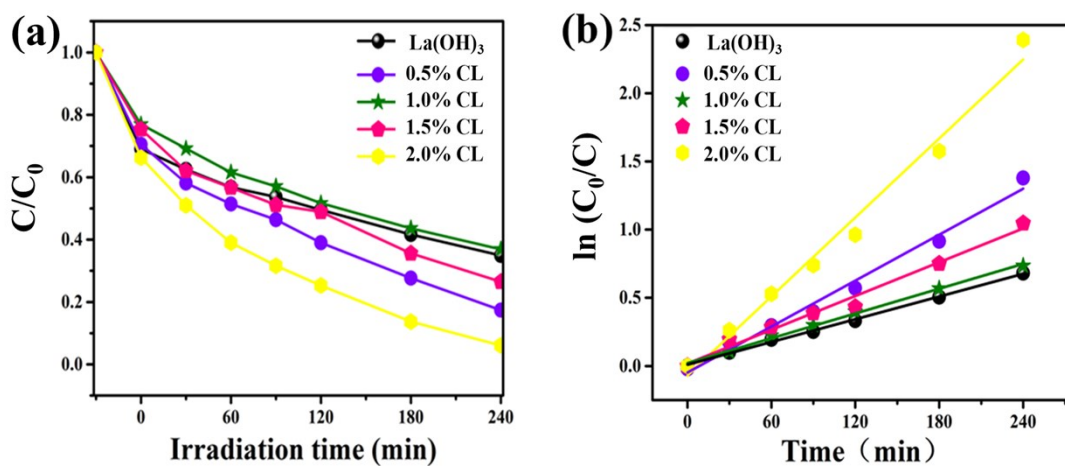

Fig. S2 (a) The photocatalytic activities of the CL and pure La(OH)<sub>3</sub> for MO degradation and (b) the pseudo-first-order reaction kinetics curves for MO degradation.

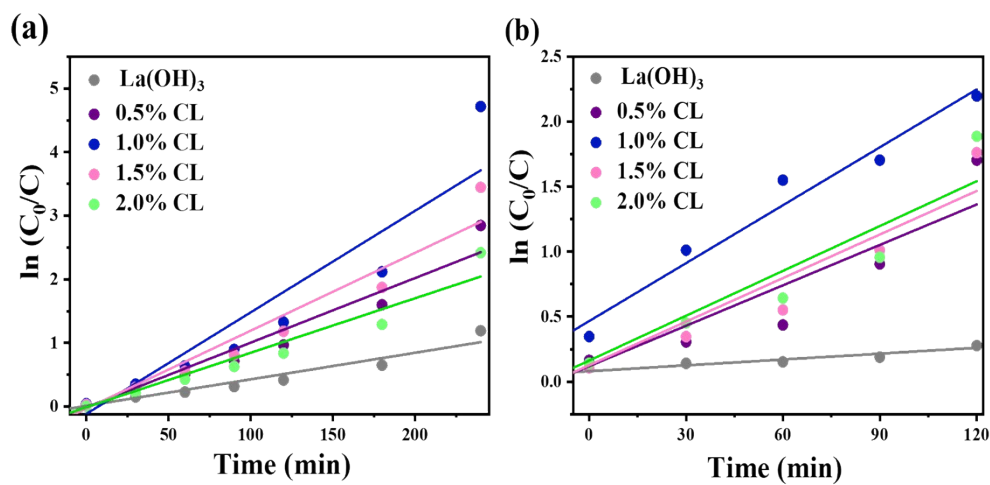

Fig. S3 (a, b) The pseudo-first-order kinetics curves for RhB degradation and Cr(VI) reduction.

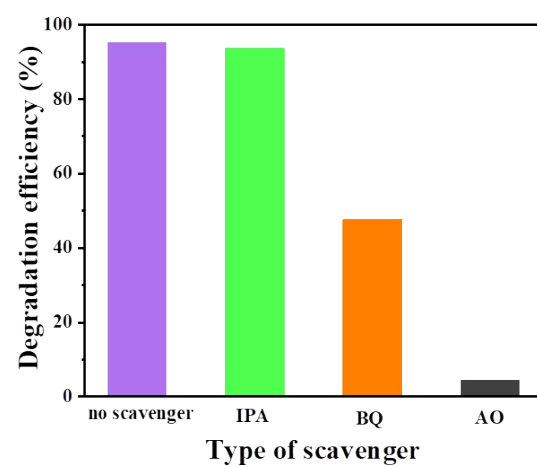

Fig. S4 Radical trapping experiments of 1.0% CL.
